# Supplementary material for: Changing paradigm of antibiotic resistance amongst Escherichia coli isolates in Indian pediatric population
Source: PubMed Central journal article supplement (PMC6469777; doi:10.1371/journal.pone.0213850), 2019-04-17
Supplement: pone.0213850.s001.pdf [file pone.0213850.s001.pdf]

**S1 Fig: Trends in antibiotic consumption in India from the year 2000 to 2015.** The data used to create this figure can be accessed at the Center for Disease Dynamics, Economics & Policy (CDDEP) Resistance Map website at <http://resistancemap.cddep.org/resmap/c/in/India>.

(A)

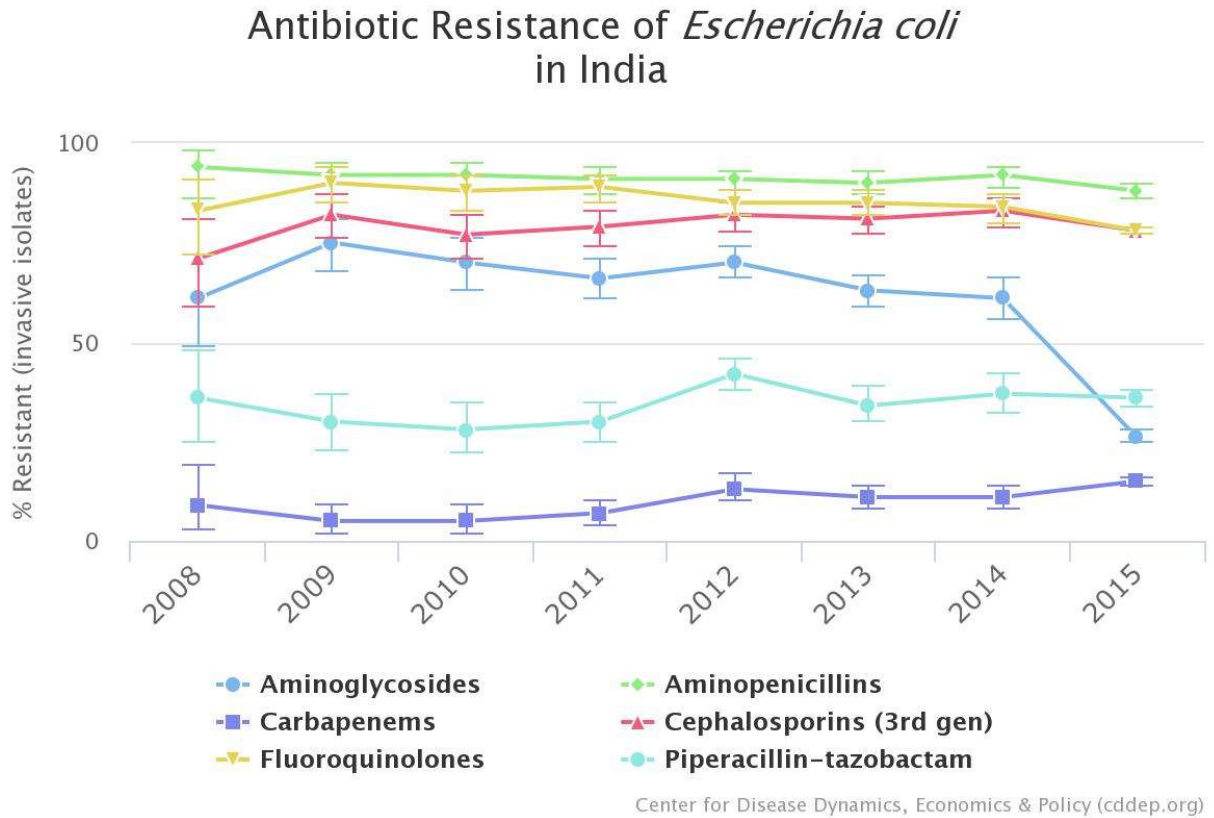

(B)

### Antibiotic Resistance of *Escherichia coli*

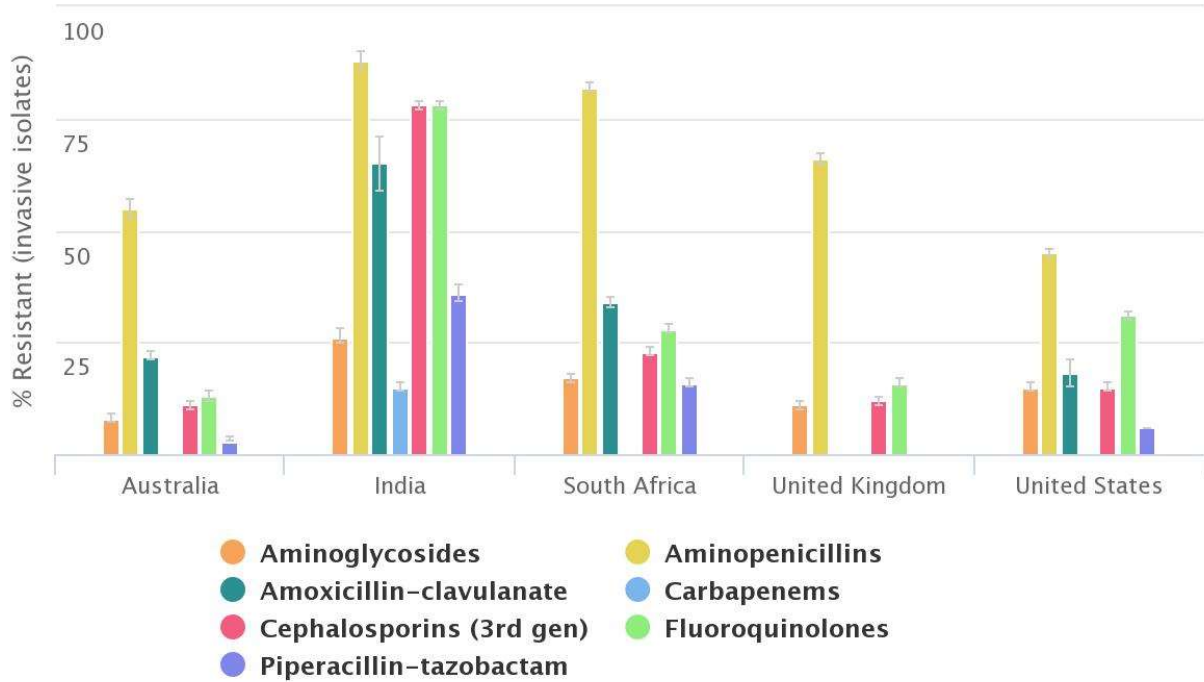

Center for Disease Dynamics, Economics & Policy (cddep.org)

(C)

## Antibiotic Use in 2015

Source: IQVIA

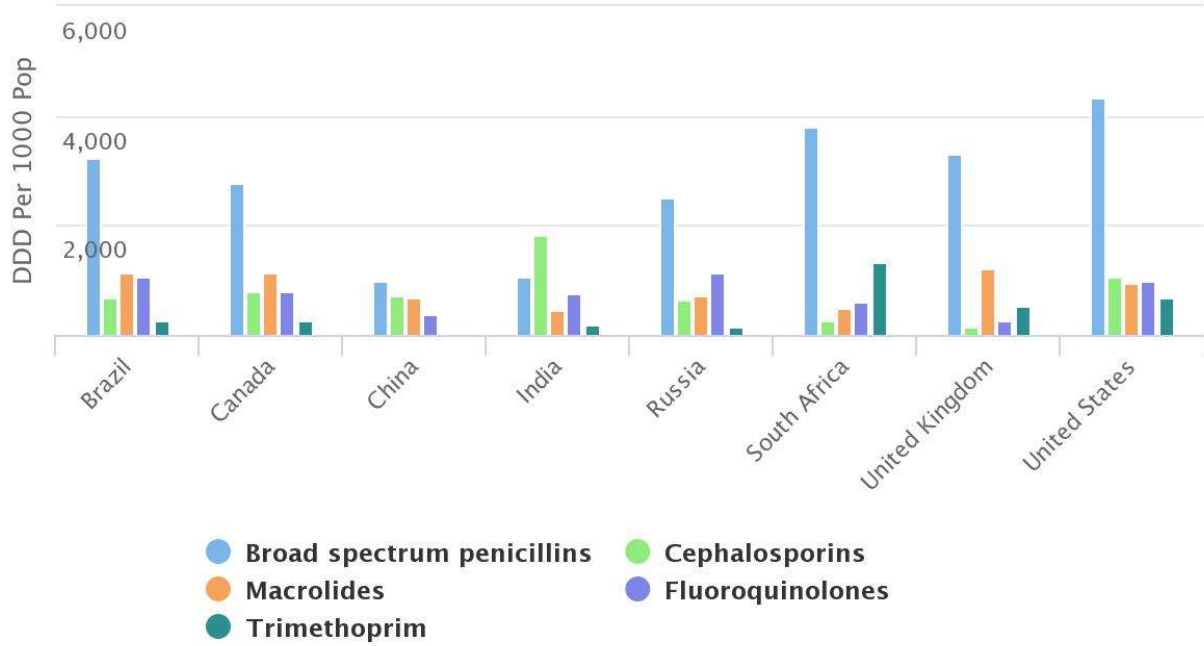

Center for Disease Dynamics, Economics & Policy ([cddep.org](http://cddep.org))

(D)

## Antibiotic Use in India

Source: IQVIA

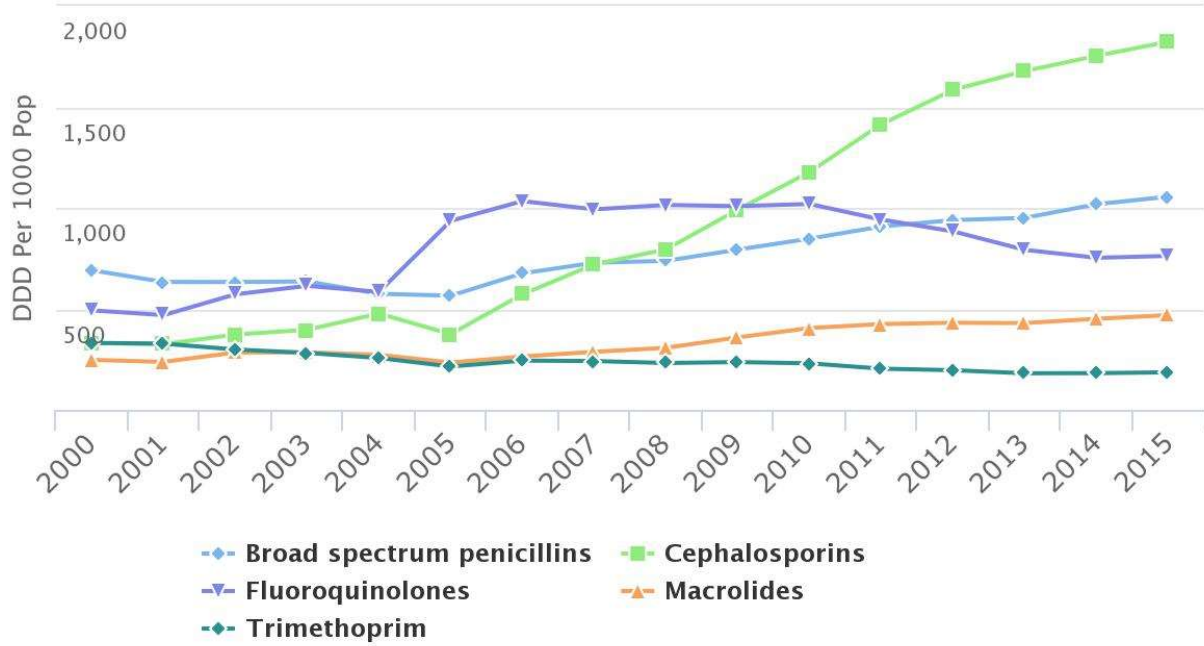

Center for Disease Dynamics, Economics & Policy (cddep.org)
