# Supplementary material for: Changing paradigm of antibiotic resistance amongst Escherichia coli isolates in Indian pediatric population
Source: PubMed Central journal article supplement (PMC6469777; doi:10.1371/journal.pone.0213850), 2019-04-17
Supplement: pone.0213850.s002.pdf [file pone.0213850.s002.pdf]

**S1 Table: Details of isolates in the three groups.**

| S.No. | Age        | Sex    | Beta-lactamase phenotype | Beta-lactamase genes detected | Resistance phenotype to antibiotics | Virulence genes detected             | Phylogroups detected | Antibiotic resistance genes detected | SNP mutation gyrA/parC | Position(s) of amino acid change(s) in: GyrA ParC |
|-------|------------|--------|--------------------------|-------------------------------|-------------------------------------|--------------------------------------|----------------------|--------------------------------------|------------------------|---------------------------------------------------|
| 10    | 3-5 years  | female | ESBL                     | Tem, shv                      | NF-CTX-NA-CIP-AMK                   | Bfp, elt, est, eae, eaf, eagg        | B1,B2                | sul1                                 | gyrA + parC            | 83 80                                             |
| 20    | 0-1 years  | female | ESBL                     | Act, dha, tem,                | CTX                                 | Bfp, stx, hyla                       | A                    | tetA, tetC                           | None                   |                                                   |
| 30    | 0-1 years  | Male   | ESBL                     | Tem                           | CTX                                 | Bfp, est, eaf, eagg                  | NONE                 | tetA, tetB                           | None                   |                                                   |
| 40    | 1- 3 years | female | ESBL                     | Shv, ctx-m                    | CTX-NA-TZP                          | Bfp, est, eaf, eagg                  | F                    | sul1                                 | GyrA                   | 83+87                                             |
| 50    | 3-5 years  | Female | ESBL                     | Act, cmy, tem, oxa            | IPM-MEM-AZT-GEN-AMP-AMK             | Bfp, eaf, eagg                       | B2                   | AacC1                                | None                   |                                                   |
| 60    | 0-1 years  | Male   | ESBL                     | Ctx                           | NF-CAZ-NA                           | Bfp, est, eae, eaf, eagg             | B1, E                | sul1                                 | None                   |                                                   |
| 70    | 1- 3 years | Female | AMPC, AmpC               | Vim, act                      | NF-CTX-NA-GEN-CIP                   | Bfp, elt, est, eagg                  | A                    | sul1, AacC1                          | gyrA + parC            | 83+87, 80                                         |
| 80    | 0-1 years  | Male   | ESBL                     | Tem                           | CTX-CIP-PB-TZP                      | Stx                                  | B2                   | sul1                                 | ParC                   | 80                                                |
| 90    | 1- 3 years | Male   | ESBL                     | Shv, oxa                      | CTX-CAZ-GEN-NA-AMK                  | Bfp, east                            | B2                   | sul1, AacC1,                         | None                   |                                                   |
| 100   | 1- 3 years | Male   | NONE                     | Shv                           | GEN-TZP                             | Bfp, est, eae, eaf, eagg             | D                    | AacC1                                | None                   |                                                   |
| 110   | 0-1 years  | Male   | ESBL                     | Oxa                           | AZT                                 | Bfp, est, eae, eagg, east            | B1, B2               | None                                 | None                   |                                                   |
| 120   | 1- 3 years | Female | NONE                     | None                          | CTX-IPM-NA-AMK                      | Bfp                                  | B2                   | sul1                                 | GyrA                   | 83                                                |
| 130   | 0-1 years  | Male   | AmpC                     | Cmy                           | CTX-CAZ-GEN-NA-AMK                  | East                                 | A                    | sul1, AacC1                          | None                   |                                                   |
| 140   | 0-1 years  | Male   | NONE                     | None                          | CTX-IPM-MEM-CAZ-TZP                 | Bfp, est, eaf, eagg, east, stx, hyla | B2                   | tetA, tetC                           | None                   |                                                   |
| 150   | 0-1 years  | Male   | ESBL                     | Cmy, tem, shv, ctx            | NF-NA-TZP                           | Bfp, est                             | B1                   | sul1                                 | GyrA                   | 83                                                |
| 160   | 3-5 years  | Male   | ESBL                     | Tem, shv                      | CTX-NA-GEN-CIP-TZP                  | Est, eagg                            | A                    | tetA, sul1, AacC1, tetC              | gyrA + parC            | 83 80+84                                          |
| 170   | 3-5 years  | Male   | AmpC                     | Act,cmy                       | CTX-CIP-AMK                         | Elt, eae                             | B1, B2, C            | sul1                                 | None                   |                                                   |
| 180   | 0-1 years  | Female | NONE                     | None                          | CIP                                 | Elt, eaf, eagg                       | NONE                 | tetA,sul1, tetB                      | None                   |                                                   |
| 190   | 0-1 years  | Male   | ESBL                     | Dha, cmy, tem, oxa            | AZT                                 | Bfp, est, eagg                       | NONE                 | tetA, tetB                           | None                   |                                                   |
| 200   | 1- 3 years | Female | ESBL                     | Tem                           | GEN-NA                              | None                                 | B1, F                | sul1, AacC1                          | None                   |                                                   |
| 210   | 1- 3 years | Female | NONE                     | Tem, shv                      | NF-CTX-NA-AMP-TZP                   | East, stx, hyla                      | B2                   | sul1                                 | None                   |                                                   |
| 220   | 0-1 years  | Male   | ESBL                     | Tem, ctx                      | CTX-CAZ-AMK                         | Bfp, est, eae, eaf, eagg             | A                    | TetA                                 | None                   |                                                   |
| 230   | 3-5 years  | Male   | ESBL                     | Ctx                           | CTX                                 | Bfp, est, eagg                       | B1                   | tetA, tetC                           | None                   |                                                   |
| 240   | 1- 3 years | Female | ESBL                     | Act, tem, shv, oxa            | NF-CTX-IPM                          | Elt, eagg                            | A, B1                | sul1                                 | None                   |                                                   |
| 250   | 1- 3 years | Female | ESBL,A MPC               | Vim, tem, shv                 | CTX-AMC-GEN-AMK-TZP                 | Elt, est, eae, eagg, east            | B2                   | tetA, AacC1, tetC                    | None                   |                                                   |
| 260   | 0-1 years  | Male   | AmpC                     | Act, dha, shv                 | CTX                                 | Bfp, elt, eaf, eagg                  | NONE                 | None                                 | None                   |                                                   |
| 270   | 1- 3 years | Male   | AMPC                     | Imp, vim                      | NF-CTX-CAZ-AZT-NA                   | Bfp, est                             | A, B1, B2            | sul1                                 | GyrA                   | 83+87                                             |
| 280   | 1- 3 years | Male   | NONE                     | Shv                           | CIP-AMK                             | Bfp, est,eagg                        | B1, B2, E            | tetA, tetB                           | ParC                   | 80+84                                             |
| 290   | 0-1 years  | Female | ESBL                     | Tem                           | CTX-GEN                             | Eaf, eagg                            | NONE                 | AacC1                                | None                   |                                                   |
| 300   | 0-1 years  | Female | ESBL                     | Tem, shv, ctx                 | GEN                                 | Bfp, est, eagg, east                 | B2                   | tetA, AacC1                          | None                   |                                                   |
| 310   | 1- 3 years | Female | ESBL                     | Tem, ctx                      | NA-TZP                              | Elt, eagg                            | B2                   | sul1                                 | None                   |                                                   |
| 320   | 0-1 years  | Male   | ESBL                     | None                          | NF-CTX-GEN                          | Bfp, est, eagg,stx, hyla             | B2                   | sul1, AacC1                          | None                   |                                                   |
| 330   | 0-1 years  | Male   | AMPC, AmpC               | Imp, dha, cmy, tem            | CTX-IPM-CAZ                         | Eagg                                 | A                    | None                                 | None                   |                                                   |
| 340   | 0-1 years  | Male   | ESBL                     | Ndm, vim                      | CTX-NA                              | Elt, eaf                             | B1, B2               | sul1                                 | None                   |                                                   |
| 350   | 0-1 years  | Male   | ESBL                     | None                          | CTX                                 | Bfp, est                             | B2                   | tetA, tetB                           | None                   |                                                   |

|     |            |        |            |                    |                    |                                |           |                   |      |       |
|-----|------------|--------|------------|--------------------|--------------------|--------------------------------|-----------|-------------------|------|-------|
| 360 | 1- 3 years | Male   | AmpC       | Act                | GEN-TZP            | Est, east                      | A, B2     | AacC1             | None |       |
| 370 | 1- 3 years | Female | ESBL       | None               | NF-NA              | Bfp, est, eae, eaf, eagg       | B2        | sul1              | None |       |
| 380 | 1- 3 years | Male   | ESBL       | Tem, shv           | CTX-CIP            | Bfp, est, eae, eaf, eagg       | B1, F     | tetA, sul1, tetC  | None |       |
| 390 | 0-1 years  | Female | ESBL       | None               | CTX-CAZ-NA-GEN     | Bfp, elt, east                 | B2        | sul1, AacC1       | GyrA | 83    |
| 400 | 0-1 years  | Male   | ESBL       | Tem, oxa           | CTX-AZT-NA-GEN-CIP | Bfp, elt, est, east            | B2        | sul1, AacC1       | GyrA | 83    |
| 1I  | 1- 3 years | Male   | ESBL       | Act, cmy           | CTX-AZT-NA-TZP     | Eagg, east                     | NONE      | tetA, sul1, tetB  | None |       |
| 2I  | 0-1 years  | Male   | ESBL       | Tem                | CTX-AMK            | Bfp, elt, est, eaf, eagg, east | NONE      | None              | None |       |
| 3I  | 0-1 years  | Male   | ESBL       | Imp, vim, tem, shv | CIP                | Elt, est, eagg, east           | B1        | sul1              | ParC | 80    |
| 4I  | 1- 3 years | Female | NONE       | None               | GEN                | Elt, est, eaf, eagg, east      | A         | AacC1             | None |       |
| 5I  | 0-1 years  | Female | NONE       | Shv                | NF-CTX             | Eaf, eagg                      | D         | sul1              | None |       |
| 6I  | 0-1 years  | Male   | ESBL       | Tem, ctx           | CTX-GEN-AMK-TZP    | None                           | NONE      | AacC1             | None |       |
| 7I  | 0-1 years  | Male   | ESBL,A MPC | Vim, shv, oxa      | CTX-IPM-NA-AMK-CCA | Bfp, est, eae, eaf, eagg, east | A, B2     | tetA, sul1, tetC  | None |       |
| 8I  | 3-5 years  | Male   | ESBL,A MPC | Ndm,vim, shv, oxa  | CTX-GEN            | Eaf, east                      | B1, B2, F | AacC1             | None |       |
| 9I  | 1- 3 years | Male   | ESBL       | None               | CTX-AZT-GEN-TZP    | East                           | NONE      | AacC1             | None |       |
| 10I | 1- 3 years | Female | ESBL       | Tem, ctx           | AZT-NA-AMP         | Est, eae, eagg, east           | NONE      | sul1, AacC1       | GyrA | 83    |
| 11I | 0-1 years  | Male   | AMPC, AmpC | Ndm, imp, act      | CTX-AMK            | Est, eae, eaf, east            | NONE      | tetA, tetB        | None |       |
| 12I | 0-1 years  | Female | ESBL,A MPC | Imp, vim, tem      | NF-CAZ             | Bfp, est, eae, eaf             | C         | sul1              | None |       |
| 13I | 0-1 years  | Female | AMPC       | Imp, vim           | CTX-GEN-CRO        | Stx                            | B2        | AacC1             | None |       |
| 14I | 3-5 years  | Male   | AMPC, AmpC | Act, cmy, shv      | NF-CTX-GEN-NA-TZP  | Bfp, east, stx                 | A         | sul1, AacC1       | None |       |
| 15I | 0-1 years  | Male   | ESBL,A mpC | Tem, shv           | IPM-AMC-AMK-TZP    | Est, eae, eaf, east, hyla      | B1        | tetA, sul1, AacC1 | None |       |
| 16I | 1- 3 years | Male   | AMPC       | Ndm, vim           | CTX-IPM-MEM-CAZ    | Bfp                            | B2        | None              | None |       |
| 17I | 3-5 years  | Female | AMPC       | Vim                | CTX-AMK            | East                           | NONE      | None              | None |       |
| 18I | 3-5 years  | Female | ESBL       | Ctx, oxa           | CTX-NA-AMK         | Bfp, east, hyla                | NONE      | tetA, sul1, tetC  | None |       |
| 19I | 0-1 years  | Female | ESBL       | Tem, shv           | CTX-TZP            | East                           | D         | None              | None |       |
| 20I | 0-1 years  | Female | ESBL,A MPC | Ndm, tem, shv, ctx | CTX-GEN            | Est                            | A, B2     | AacC1,            | None |       |
| 21I | 0-1 years  | Female | ESBL,A MPC | Ndm, imp, ctx, oxa | CTX-AMP            | Eae, eaf, east                 | B2        | tetA, tetB        | None |       |
| 22I | 1- 3 years | Female | AMPC       | None               | CTX-NA-TZP         | Bfp, est, eae, eaf             | B1        | sul1              | None |       |
| 23I | 0-1 years  | Male   | ESBL       | Shv, ctx           | NF-CTX-AZT-TZP     | Bfp, est, eae                  | E         | sul1              | None |       |
| 24I | 0-1 years  | Female | NONE       | None               | CTX-GEN            | Est, eae, eaf, eagg            | B1        | AacC1             | None |       |
| 25I | 3-5 years  | Female | ESBL       | Act, cmy           | CTX                | Est, eae, eagg                 | B2        | tetA, tetC        | None |       |
| 26I | 0-1 years  | Male   | NONE       | None               | NF-CTX-NA-AMK      | Bfp, elt, est, east            | B1, B2    | sul1              | GyrA | 83+87 |
| 27I | 1- 3 years | Female | NONE       | None               | NF-CTX-AMP         | Bfp, est, eae, eaf, eagg, east | B1        | tetA, sul1        | None |       |
| 28I | 0-1 years  | Female | ESBL,A MPC | Tem, shv           | CTX-AMK-TZP        | Est, eae, eaf                  | A, B2, F  | None              | None |       |
| 29I | 0-1 years  | Male   | NONE       | Act, tem, shv, ctx | CAZ-GEN-NA         | Bfp, est, eae, eagg            | B2        | sul1, AacC1,      | None |       |
| 30I | 0-1 years  | Male   | NONE       | None               | CTX-NA             | Bfp, est, eae, eagg            | B1        | tetA, sul1, tetC  | None |       |
| 31I | 0-1 years  | Female | ESBL,A mpC | Tem, shv, ctx      | CTX-AMK            | Eae, eaf, eagg                 | B2        | tetA, tetB        | None |       |
| 32I | 3-5 years  | Female | ESBL       | Tem, oxa           | CTX-GEN-NA         | Bfp, elt, eae, eaf, eagg       | NONE      | sul1, AacC1,      | GyrA | 83    |
| 33I | 1- 3 years | Male   | ESBL,A MPC | Vim, shv           | CTX-AZT-GEN-NA     | Bfp, eae, eaf, eagg            | B2, F     | sul1, AacC1,      | GyrA | 83    |

|     |            |        |               |                                         |                        |                              |        |                     |      |       |
|-----|------------|--------|---------------|-----------------------------------------|------------------------|------------------------------|--------|---------------------|------|-------|
| 34I | 0-1 years  | Male   | ESBL          | Shv, ctx                                | CTX-GEN-NA             | Eae, eaf                     | B1     | sul1, AacC1         | None |       |
| 35I | 3-5 years  | Female | ESBL,A<br>mpC | Dha, tem                                | CTX-AMK                | Elt, eae, eaf, eagg,<br>east | NONE   | tetA, tetC          | None |       |
| 36I | 0-1 years  | Female | ESBL          | Act                                     | CTX-NA                 | Bfp, eae, eagg               | NONE   | sul1                | None |       |
| 37I | 3-5 years  | Female | ESBL,A<br>mpC | Cmy, ctx, oxa                           | CTX                    | Est, eae, eaf, eagg          | B2, D  | None                | None |       |
| 38I | 0-1 years  | Male   | ESBL,A<br>mpC | Dha                                     | CTX-AMC-GEN-NA-<br>AMK | Bfp, elt, eae, eaf           | NONE   | sul1, AacC1,        | None |       |
| 39I | 3-5 years  | Male   | ESBL          | Imp, vim, tem,<br>oxa                   | CTX-GEN-NA             | Eae, eaf, eagg               | NONE   | sul1, AacC1         | None |       |
| 40I | 0-1 years  | Male   | ESBL          | Ctx                                     | NF-CAZ-NA-AMK          | Bfp, est, eae, eagg          | NONE   | sul1, dfrB1         | None |       |
| 1C  | 1- 3 years | Male   | NONE          | None                                    | NF-GEN-NA              | None                         | A, B2  | sul1, AacC1         | GyrA | 83    |
| 2C  | 0-1 years  | female | AmpC          | Act, shv                                | NONE                   | None                         | NONE   | None                | None |       |
| 3C  | 3-5 years  | Male   | ESBL          | Tem, shv                                | CTX-NA                 | None                         | B2     | tetA, sul1,<br>tetB | None |       |
| 4C  | 3-5 years  | Male   | ESBL          | Tem                                     | NA                     | None                         | NONE   | sul1,               | None |       |
| 5C  | 3-5 years  | Female | ESBL          | Shv, ctx, oxa                           | NA                     | None                         | NONE   | sul1,               | None |       |
| 6C  | 0-1 years  | Male   | AMPC,A<br>mpC | Ndm, act, ctx                           | NA-TZP                 | None                         | A      | sul1,               | None |       |
| 7C  | 3-5 years  | Male   | ESBL,A<br>MPC | Imp, vim, act,<br>cmy, tem, shv,<br>oxa | NF-GEN                 | Eagg                         | NONE   | sul1, AacC1         | None |       |
| 8C  | 1- 3 years | Male   | AMPC          | Ndm                                     | NF                     | Eae                          | B1, B2 | sul1                | None |       |
| 9C  | 3-5 years  | Male   | ESBL          | Shv                                     | NF-CIP                 | Eae                          | NONE   | sul1                | None |       |
| 10C | 1- 3 years | Male   | NONE          | Ctx                                     | NONE                   | Eae, eagg                    | A      | None                | None |       |
| 11C | 3-5 years  | Male   | AmpC          | Dha                                     | NA                     | Bfp, eaf, eagg               | NONE   | sul 1               | None |       |
| 12C | 0-1 years  | Male   | ESBL          | Tem, shv, oxa                           | CTX-NA-CRO             | Stx, hyla                    | B1, B2 | tetA, sul1          | GyrA | 83+87 |
| 13C | 0-1 years  | Male   | ESBL          | Ctx                                     | CTX-NA                 | None                         | NONE   | sul1                | None |       |
| 14C | 0-1 years  | Male   | ESBL          | Shv, oxa                                | NONE                   | None                         | NONE   | None                | None |       |
| 15C | 1- 3 years | Female | AMPC,A<br>mpC | Vim, cmy, ctx                           | NONE                   | Bfp                          | B2, C  | None                | None |       |
| 16C | 0-1 years  | Male   | ESBL,A<br>MPC | Ndm, vim, tem,<br>oxa                   | NA                     | bfp                          | NONE   | sul1                | None |       |
| 17C | 0-1 years  | Male   | AMPC          | Imp                                     | NONE                   | Eae                          | B1     | None                | None |       |
| 18C | 3-5 years  | Male   | ESBL          | Tem                                     | NA                     | Eae                          | NONE   | None                | None |       |
| 19C | 1- 3 years | Male   | NONE          | None                                    | NA                     | Eaf                          | E      | sul1                | None |       |
| 20C | 1- 3 years | Male   | AmpC          | Act, cmy                                | NONE                   | Eagg                         | NONE   | None                | None |       |
| 21C | 1- 3 years | Female | ESBL          | Tem                                     | CTX                    | East                         | B2     | tetA, tetB          | None |       |
| 22C | 0-1 years  | Male   | ESBL          | Shv                                     | NA                     | Eaf, eagg                    | NONE   | sul1                | GyrA | 83    |
| 23C | 1- 3 years | Male   | ESBL          | Act, dha, tem,<br>shv                   | NF                     | Bfp, east                    | NONE   | sul1                | None |       |
| 24C | 3-5 years  | Male   | AMPC,A<br>mpC | Ndm, vim, act                           | NONE                   | Bfp, eagg                    | A      | None                | None |       |
| 25C | 0-1 years  | Male   | ESBL,A<br>MPC | Imp, vim                                | NA-TZP                 | Bfp, eagg                    | B1, D  | None                | None |       |
| 26C | 0-1 years  | Male   | AMPC          | Ndm, vim, dha,<br>cmy, ctx              | CTX-NA                 | Eae                          | NONE   | sul1                | None |       |
| 27C | 3-5 years  | Male   | ESBL          | Tem, shv                                | NF                     | Eae, eaf, eagg               | NONE   | sul1                | None |       |
| 28C | 0-1 years  | Male   | NONE          | None                                    | NONE                   | Eagg                         | B2     | None                | None |       |
| 29C | 3-5 years  | Male   | AmpC          | Act, dha                                | NF                     | Eagg                         | NONE   | sul1                | None |       |
| 30C | 0-1 years  | Male   | ESBL          | Tem                                     | NA                     | None                         | B2     | None                | None |       |
| 31C | 3-5 years  | Female | ESBL          | Tem                                     | NONE                   | None                         | NONE   | None ,              | None |       |
| 32C | 0-1 years  | Male   | ESBL          | Tem, shv                                | CTX                    | Eaf, eagg                    | NONE   | tetA, tetC          | None |       |

|     |            |        |            |               |        |                 |       |                  |      |    |
|-----|------------|--------|------------|---------------|--------|-----------------|-------|------------------|------|----|
| 33C | 3-5 years  | Female | AMPC, AmpC | Imp, vim      | NF-CTX | eae             | B1, F | tetA, sul1, tetB | None |    |
| 34C | 1- 3 years | Female | ESBL, AmpC | Ndm, imp, act | NONE   | Eaf, eagg, hyla | NONE  | None             | None |    |
| 35C | 1- 3 years | Male   | AMPC       | Imp           | NA     | Bfp, eaf        | NONE  | sul1             | GyrA | 83 |
| 36C | 0-1 years  | Female | ESBL       | Tem, oxa      | NONE   | est             | D     | None             | None |    |
| 37C | 1- 3 years | Female | NONE       | Ctx           | NA     | Eae, eaf        | A     | sul1             | None |    |
| 38C | 1- 3 years | Male   | AmpC       | Dha, emy      | NA     | None            | B2    | sul1             | None |    |
| 39C | 0-1 years  | Male   | ESBL       | Tem, shv      | NF     | Bfp, eae, eagg  | NONE  | sul1             | None |    |
| 40C | 0-1 years  | Male   | ESBL       | Tem, ctx, oxa | NF     | bfp             | B2    | sul1             | None |    |

Note: Each group included 40 subjects and were categorized as diarrhoeal (O), non-diarrhoeal (I) and healthy (C).
