# Supplementary material for: Changing paradigm of antibiotic resistance amongst Escherichia coli isolates in Indian pediatric population
Source: PubMed Central journal article supplement (PMC6469777; doi:10.1371/journal.pone.0213850), 2019-04-17
Supplement: pone.0213850.s003.pdf [file pone.0213850.s003.pdf]

**S2 Table:** Frequency of resistance to antimicrobial agents of *E. coli* isolates from the three study groups.

| Antibiotics                            | Group 1<br>n=40 (%) | Group 2<br>n=40 (%) | Group 3<br>n=40 (%) | Total<br>n =120 (%) | P value |
|----------------------------------------|---------------------|---------------------|---------------------|---------------------|---------|
| Norfloxacin(10µg)                      | 9(22.5)             | 7(17.5)             | 10(25)              | 26(21.66)           | 0.709   |
| Cefotaxime (30µg)                      | 27(67.5)            | 33(82.5)            | 7((17.5)            | 67(55.83)           | 0.00*   |
| Imipenem (10µg)                        | 12(32.5)            | 5(12.5)             | 1(2.5)              | 18 (15)             | 0.002*  |
| Meropenem (10µg)                       | 2(5)                | 1(2.5)              | 0                   | 3(2.5)              | 0.358   |
| Ceftazidime(30µg)                      | 8(20)               | 4(10)               | 0                   | 12(10)              | 0.011*  |
| Azetronam (30µg)                       | 5(12.5)             | 6(15)               | 0                   | 11(9.1)             | 0.044*  |
| Nalidixic acid(30µg)                   | 8(20)               | 0                   | 0                   | 14(11.66)           | 0.00*   |
| Amoxicillin/clavulanic acid(20/10µg)   | 1(2.5)              | 2(5)                | 0                   | 3(2.5)              | 0.358   |
| Gentamicin (10µg)                      | 15(37.5)            | 14(35)              | 2(5)                | 31(25.83)           | 0.01*   |
| Ciprofloxacin (5µg)                    | 7(17.5)             | 4(10)               | 1(2.5)              | 12(10)              | 0.082   |
| Ampicillin(10µg)                       | 17 (42.5)           | 9 (22.5)            | 4 (10)              | 30 (25)             | 0.01*   |
| Amikacin (30µg)                        | 9(22.5)             | 14(35)              | 0                   | 23(19.1)            | 0.00*   |
| Polymyxin B (300µg)                    | 1(2.5)              | 0                   | 0                   | 1(0.83)             | 0.364   |
| Cefotaxime + clavulanic acid (30/10µg) | 0                   | 1(2.5)              | 0                   | 1(0.83)             | 0.364   |
| Ceftriaxone (30µg)                     | 0                   | 1(2.5)              | 1(2.5)              | 2(1.66)             | 0.601   |
| Piperacillin+tazobactam (100/10µg)     | 10(25)              | 9(22.5)             | 2(5)                | 21(17.5)            | 0.037*  |

\*Statistically significant; Antibiotic frequencies are presented as absolute numbers (n) with percentage in parentheses; Group 1 - diarrhoeal, Group 2 - non-diarrhoeal, and Group 3 - healthy.
